# Supplementary material for: Single-Center Retrospective Analysis of Paraneoplastic Syndromes with Peripheral Nerve Damage
Source: MDPI journal article supplement (doi:10.3390/brainsci12121656), 2022-12-02
Supplement: s1 [file s1]

**Table S1.** Paraneoplastic neurological syndromes identified in our cohort, their associated neoplasms, onconeural antibodies and tumor markers, presenting mRS and duration of neurological symptoms at presentation.

| Case # | Age sex | Tumor markers/Onconeural anti-body           | Cancer                  | Syndrome        | mRS | Time from symptom onset (months) |
|--------|---------|----------------------------------------------|-------------------------|-----------------|-----|----------------------------------|
| 1      | 61 m    | AFP(>1210), AFP-L3(>1210),AFP-L3/            | Liver cancer            | MND             | 3   | 24                               |
| 2      | 49 m    | AFP(>0.1),CA125(103.4),NSE(20.91),FER(454.2) | Lung cancer             | CSMN            | 3   | 12                               |
| 3      | 66 m    | FER(488.9)                                   | Lung cancer             | LEMS            | 3   | 5                                |
| 4      | 47 f    | CEA(19.38),CA724(8.59),NSE(27.74)            | ND                      | SSN             | 3   | 24                               |
| 5      | 69 m    | Anti-Hu (+)                                  | Lung cancer             | SSN             | 4   | 2                                |
| 6      | 60 m    | CA125(39.74),CA153(48.91),CA724(7.55),       | Lung cancer             | SSN             | 3   | 12                               |
| 7      | 75 m    | NSE(26.52),FER(635.4)                        | Lung cancer             | SSN             | 2   | 0.5                              |
| 8      | 36 f    | CY211(7.26),NSE(26.69)                       | Breast cancer           | CSMN            | 3   | 3                                |
| 9      | 73 m    | amphiphysin (+)                              | Liver cancer            | SSN             | 1   | 1                                |
| 10     | 60 m    | AFP(111.1), AFPL3(6.1),CA199(92.88),         | Cardia Cancer           | SSN             | 3   | 12                               |
| 11     | 73 m    | FER(609.10)                                  | Lung cancer             | Dermatomyositis | 3   | 0.7                              |
| 12     | 68 m    | CEA(58.14)                                   | Lung cancer             | SSN             | 4   | 2                                |
| 13     | 64 m    | FER(462.6)                                   | Transverse colon cancer | GBS             | 4   | 0.5                              |
| 14     | 51 m    | ND                                           | Inguinal melanoma       | SSN             | 4   | 11                               |
| 15     | 59 m    | ND                                           | Lung cancer             | SSN             | 5   | 3                                |
| 16     | 65 m    | FER(1079)                                    | Lung cancer             | MND             | 4   | 12                               |
| 17     | 60 m    | (-)                                          | Lung cancer             | SSN             | 3   | 1                                |
| 18     | 50 m    | CEA(10.11),FER(574.79)                       | Lung cancer             | CSMN            | 3   | 9                                |
| 19     | 65 m    | Anti-Hu (+), FER(713.8)                      | Kidney cancer           | MND             | 4   | 36                               |
| 20     | 57 m    | CA724(19.2),FER(505.5)                       | Lung cancer             | MG              | 3   | 4                                |
| 21     | 64 m    | NSE(16.92)                                   | Lung cancer             | GBS             | 4   | 2                                |
| 22     | 66 m    | Anti-Hu (+), CA153(26.25),                   | Esophageal cancer       | SSN             | 2   | 2                                |
| 23     | 67 m    | (-)                                          | Lung cancer?            | CSMN            | 3   | 12                               |
| 24     | 69 m    | (-)                                          | Lang cancer             | SSN             | 2   | 2                                |
| 25     | 68 m    | ND                                           | Lung cancer             | CSMN            | 3   | 1                                |

M = male, F = female, MND = motor neuron disease, FER=Ferritin, SSN=subacute sensory neuronopathy, GBS=Guillain-barre syndrome, CSMN=Chronic Sensorimotor neuropathies, ND=not done, LEMS=Lambert-Eaton myasthenic syndrome, MG=Myasthenia gravis, AFP=alpha-fetoprotein, AFP-L3=AFP- heterogeneity L3, CEA=carcinoembryonic antigen, CA125/153/724/199= carbohydrate antigens 125/153/724/199, CY21-1=cytokeratin 19 fragments, NSE =neuron specific enolase, tPSA=total prostate specific antigen, fPSA=free prostate specific antigen.

**Table S2.** The abnormalities of the recorded nerves.

|       | Nerve             | DML  | dCMAP/SNAP | MCV/SCV |
|-------|-------------------|------|------------|---------|
| Motor | Right-median. N   | 5/20 | 8/20       | 5/20    |
|       | Right-Ulnar. N    | 4/20 | 7/20       | 4/20    |
|       | Right-Peroneal. N | 4/20 | 10/20      | 9/20    |
|       | Right-Tiabial. N  | 3/12 | 6/12       | 6/12    |
|       | Left-Peroneal. N  | 4/19 | 8/19       | 10/19   |

|       |                   |                |                |                |
|-------|-------------------|----------------|----------------|----------------|
|       | Left-Tibial. N    | 3/11           | 6/11           | 6/11           |
|       | Total             | 23/102, 22.55% | 45/102, 44.12% | 40/102, 39.22% |
| Sense | Right-Median. N   |                | 8/20           | 8/20           |
|       | Right-Ulnar. N    |                | 8/20           | 6/20           |
|       | Right-Peroneal. N |                | 9/20           | 5/20           |
|       | Left-Peroneal. N  |                | 10/20          | 5/20           |
|       | Total             |                | 35/80, 43.75%  | 24/80, 30.00%  |

dCMAP: compound muscle action potential with distal; SNAP: sensory nerve action potential; MCV: conduction velocity of motor; SCV: conduction velocity of sensory; DML: distal motor latency.

**Table S3.** Comparison of abnormal rate of each parameter.

| Parameter 1                            | Parameter 2                            | X <sup>2</sup> | P value |
|----------------------------------------|----------------------------------------|----------------|---------|
| Motor nerve abnormality 59/102 (57.8%) | Sense nerve abnormality 39/80 (48.8%)  | 1.49           | 0.22    |
| amplitude 80/182 (43.96%)              | NCV 64/182 (35.17%)                    | 2.94           | 0.09    |
| CMAP 45/102 (44.12%)                   | DML 23/102 (22.55%)                    | 10.68          | 0.001   |
| MCV 40/102 (39.22%)                    | DML 23/102 (22.55%)                    | 6.64           | 0.01    |
| CMAP 45/102 (44.12%)                   | MCV 40/102 (39.22%)                    | 0.50           | 0.48    |
| SNAP 35/80 (43.75%)                    | SCV 24/80 (30.00%)                     | 3.25           | 0.07    |
| Upper limbs nerve 39/80 (48.75%)       | lower limbs nerve 59/102 (57.84%)      | 1.49           | 0.22    |
| Upper limbs motor nerve 20/40 (50.00%) | lower limbs motor nerve 38/62 (61.29%) | 1.26           | 0.26    |
| Upper CMAP 5/40 (37.50%)               | Lower CMAP 30/62 (48.39%)              | 1.17           | 0.28    |
| Upper MCV 9/40 (22.50%)                | Lower MCV 31/62 (50.00%)               | 7.71           | 0.005   |
| Upper DML 9/40 (22.50%)                | Upper CMAP 15/40 (37.50%)              | 2.14           | 0.14    |
| Lower CMAP 30/62 (48.39%)              | Lower DML 14/62 (22.50%)               | 9.02           | 0.003   |
| Lower SNAP 19/40 (47.50%)              | Lower NCV 10/40 (25.00%)               | 9.66           | 0.003   |

NCV: nerve conduction velocity; CMAP: compound muscle action potential; DML: distal motor latency; MCV: conduction velocity of motor; SNAP: sensory nerve action potential; SCV: conduction velocity of sensory;.

**Table S4.** Comparison between subacute sensory neuropathy and other syndromes.

|                             | Subacute Sensory<br>Neuronopathy | Other Syndromes | X <sup>2</sup> / U | p value |
|-----------------------------|----------------------------------|-----------------|--------------------|---------|
| Sensory nerve involvement   | 9/10(90%)                        | 3/10(30%)       | 5.21               | 0.02    |
| Complain of weakness        | 6/10(60%)                        | 10/10(1000%)    | 30.00              | 0.03    |
| Complain of paresthesia     | 8/10(80%)                        | 2/10(20%)       | 7.20               | 0.01    |
| Mean of Motor DML           | 0.80, 0.67                       | 0.86, 0.11      | 32.00              | 0.19    |
| Mean of dCMAP               | 1.28±0.74                        | 0.95±0.72       | 1.01               | 0.33    |
| Mean of SNAP                | 1.04±0.87                        | 2.26±1.25       | 2.54               | 0.02    |
| Motor nerve of lower dCMAP  | 1.17±0.84                        | 0.93±0.77       | 0.68               | 0.51    |
| Sensory nerve of lower SNAP | 0.76±0.67                        | 1.52±0.87       | 2.19               | 0.04    |
| Sensory nerve of upper SNAP | 1.32±1.19                        | 3.01±1.92       | 2.36               | 0.03    |
| Mean of NCV                 | 0.94, 0.37                       | 1.10, 0.17      | 20.00              | 0.02    |
| Mean of Motor NCV           | 0.96, 0.46                       | 1.08, 0.09      | 20.00              | 0.04    |
| Mean of sensory NCV         | 0.92, 0.31                       | 1.09, 0.08      | 28.00              | 0.11    |
| Motor nerve of lower NCV    | 0.93, 0.51                       | 1.01, 0.11      | 31.00              | 0.17    |
| Sensory nerve of lower NCV  | 0.96, 0.29                       | 1.06, 0.03      | 20.50              | 0.02    |
| Sensory nerve of upper NCV  | 0.88, 0.28                       | 1.10, 0.20      | 32.00              | 0.19    |

DML: distal motor latency; dCMAP: compound muscle action potential with distal;  
SNAP: sensory nerve action potential;; NCV: nerve conduction velocity;.
